# Supplementary material for: Merkel cell polyomavirus recruits MYCL to the EP400 complex to promote oncogenesis
Source: PubMed Central journal article supplement (PMC5640240; doi:10.1371/journal.ppat.1006668), 2017-10-13

S6 Fig. Principal Components Analysis (PCA) plots before and after adjustment for batch effects

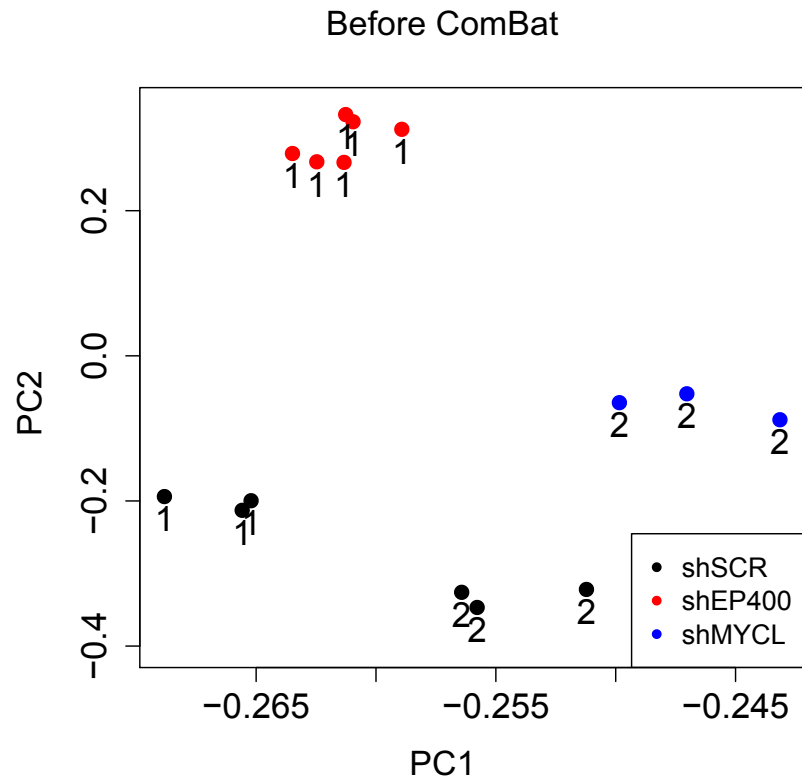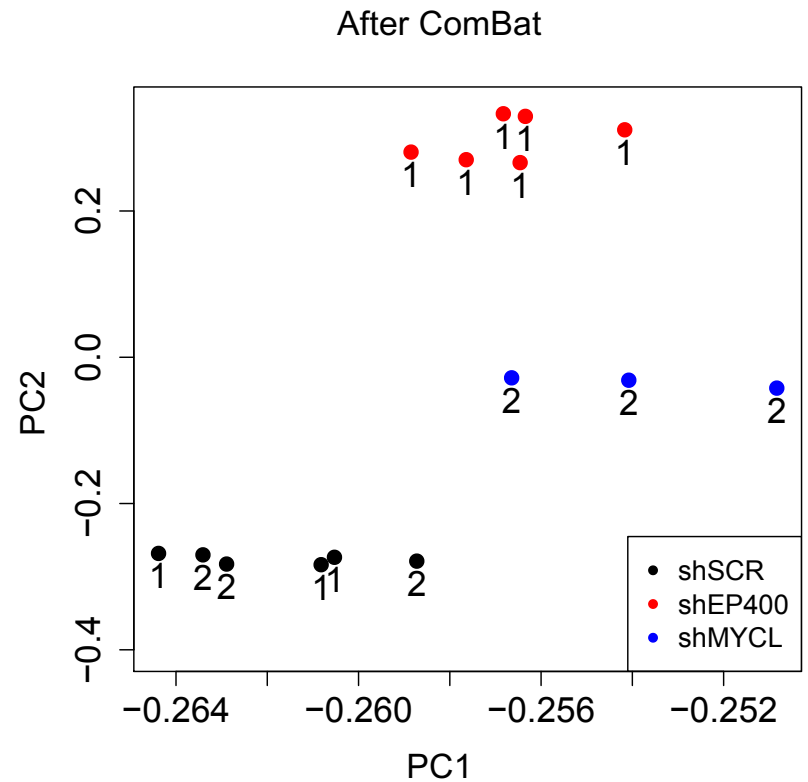

Supplement: ppat.1006668.s006.pdf [file ppat.1006668.s006.pdf]
