# Supplementary material for: Merkel cell polyomavirus recruits MYCL to the EP400 complex to promote oncogenesis
Source: PLOS journal article supplement (doi:10.1371/journal.ppat.1006668), 2017-10-13

# S7 Fig. MCPyV ST cooperates with MYCL and EP400 complex to activate gene expression

**A**

activating/repressive function prediction

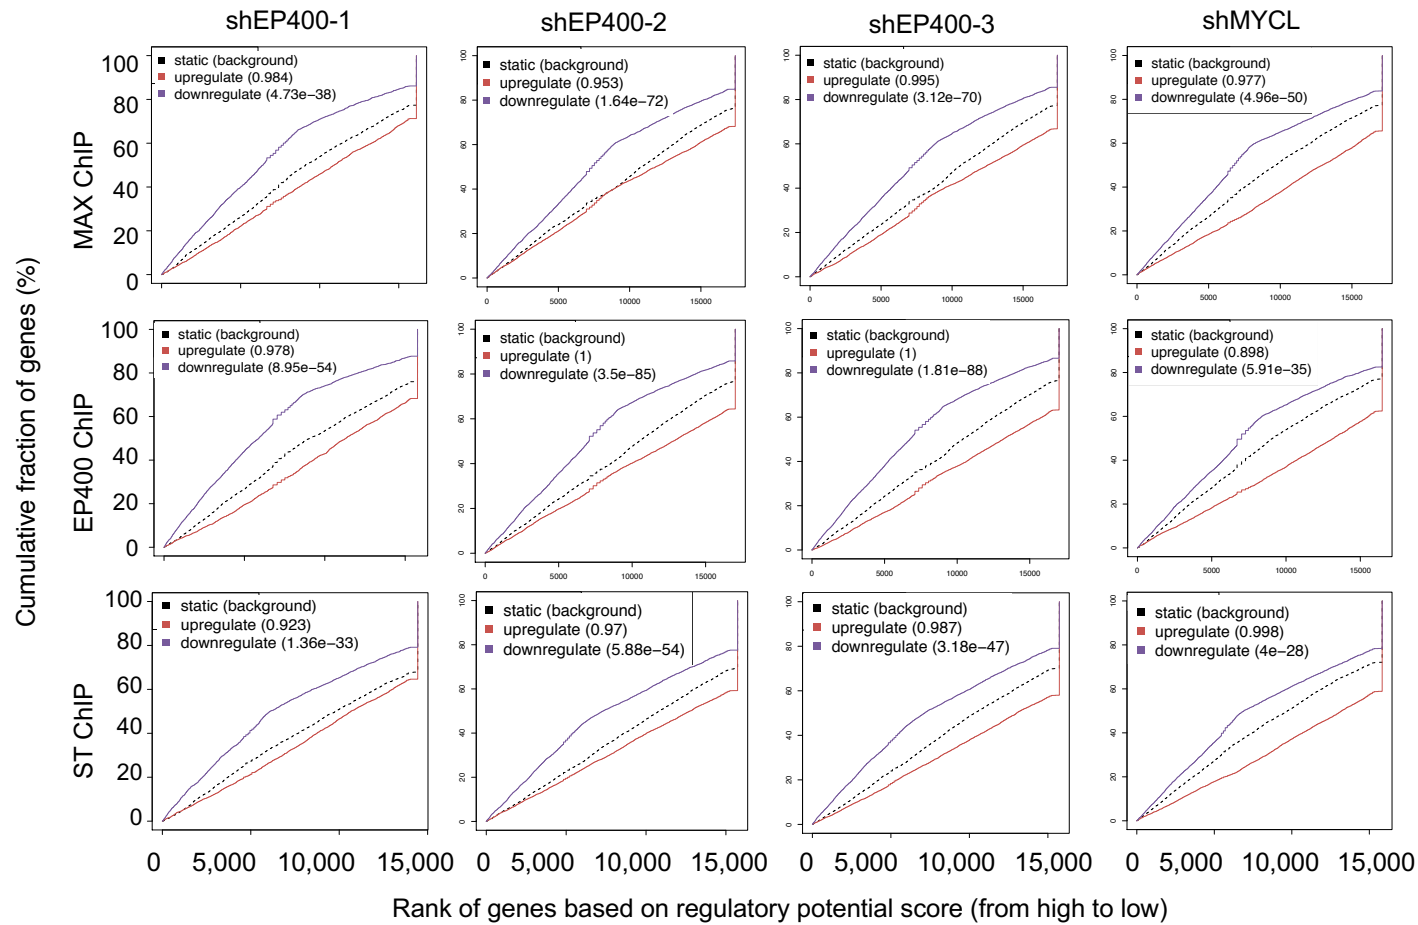

**B**

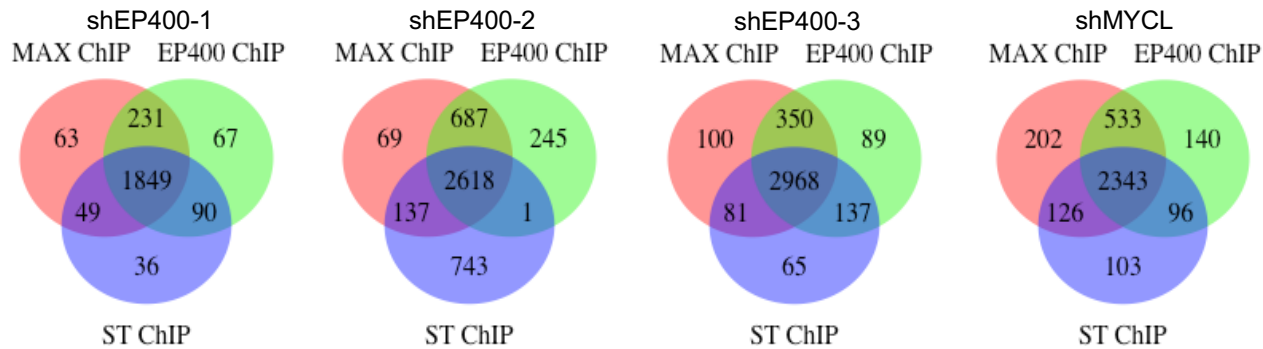

**C**

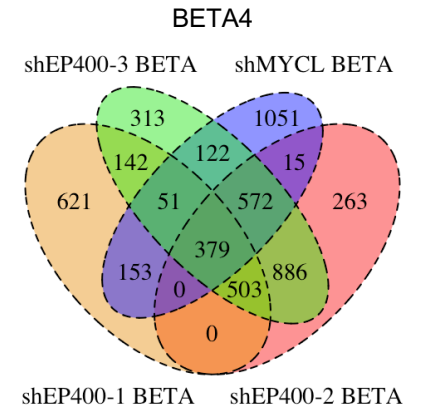

Supplement: S7 (10.1371/journal.ppat.1006668.s007) [file journal.ppat.1006668.s007]
